# Supplementary material
Source: PubMed Central journal article supplement (PMC8545761)
Supplement: NIHMS1732580-supplement-Supplement_1.pdf [file NIHMS1732580-supplement-Supplement_1.pdf]

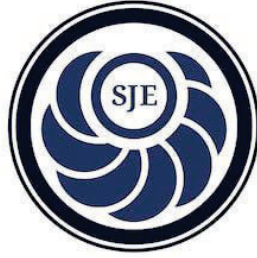

SCIENCE JOURNAL  
**EDITORS**

[www.scienceje.com](http://www.scienceje.com)

## EDITORIAL CERTIFICATE

---

This certificate confirms that the manuscript below has been edited for grammar, spelling, flow, and other areas by a highly experienced and native English-speaking editor at Science Journal Editors (SJE), a rigorous editing company specializing in editing the language of manuscripts and academic research.

**ORDER NUMBER:** F2E305T1

**Title:** Association of Body Mass Index with Clinical Outcomes in Patients with Heart Failure with Reduced Ejection Fraction treated with Sacubitril/Valsartan

**AUTHOR(S):** Kazuhiko Kido, Pharm.D.; Christopher Bianco, D.O.; Marco Caccamo, D.O.;  
Wei Fang, Ph.D.; George Sokos, D.O.

**ISSUED:** 3/29/21

**APPROVING EDITOR:** Thomas C. Hardy

A handwritten signature in black ink that reads 'Thomas Hardy'. The signature is written in a cursive, flowing style.

---

The content as stated by the author was not altered during the editing process, and the English in the manuscript is publication-ready, provided that the author accepts all changes as suggested by our editors.

Any questions or comments should be directed to: [info@scienceje.com](mailto:info@scienceje.com)
