# Supplementary material
Source: PubMed Central journal article supplement (PMC8545761)

Supplemental Table 1. Testing the proportional hazards assumption of a Cox regression

| Outcome                                                                | p-value |
|------------------------------------------------------------------------|---------|
| Hospitalization for heart failure (univariate analysis)                | 0.16    |
| All-cause mortality (univariate analysis)                              | 0.08    |
| Hospitalization for heart failure (the Cox proportional hazards model) | 0.021   |
| All-cause mortality (the Cox proportional hazard model)                | 0.004   |

Supplemental figure 1. The distribution of weights used for hospitalization for HF before truncation

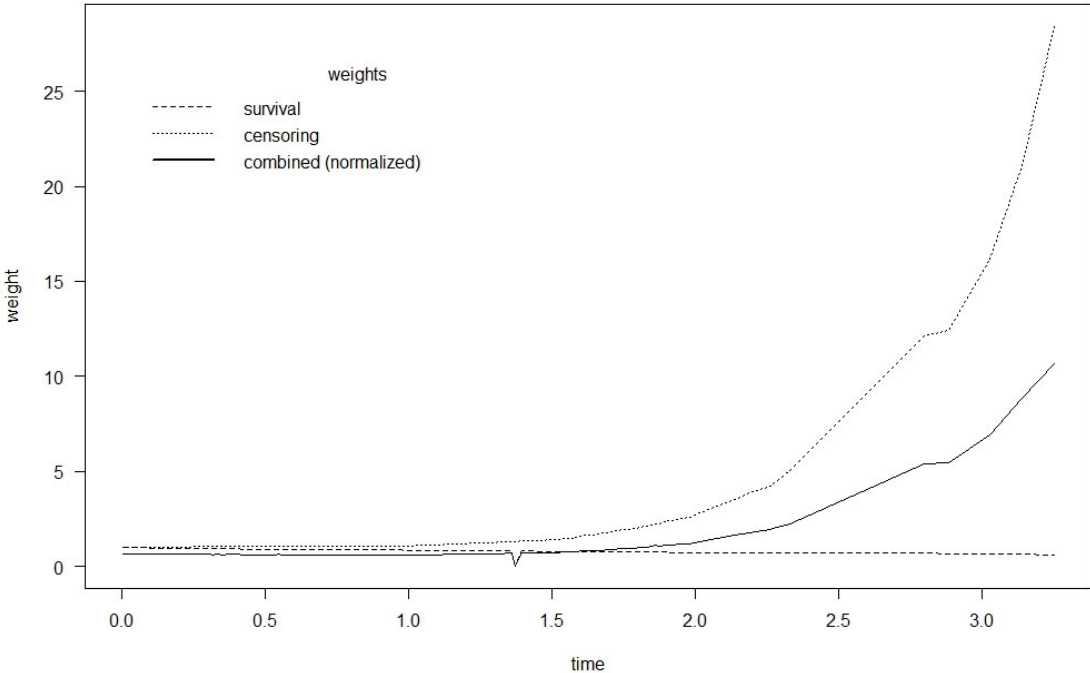

Supplemental figure 2. The distribution of weights used for all-cause mortality before truncation

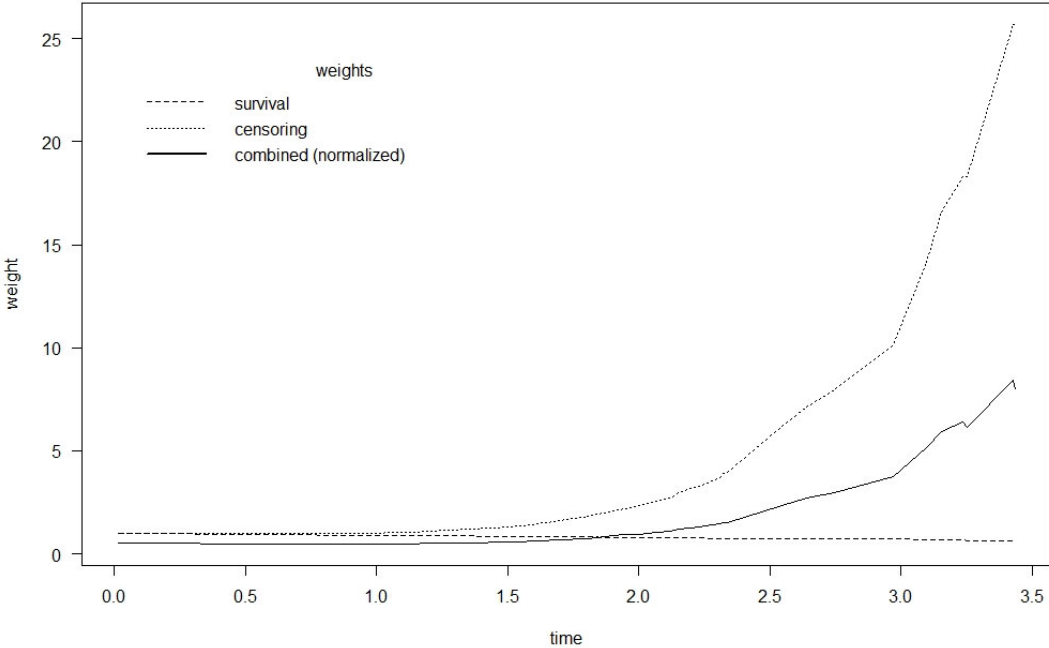

Supplemental figure 3. The distribution of weights used for hospitalization for HF after truncation

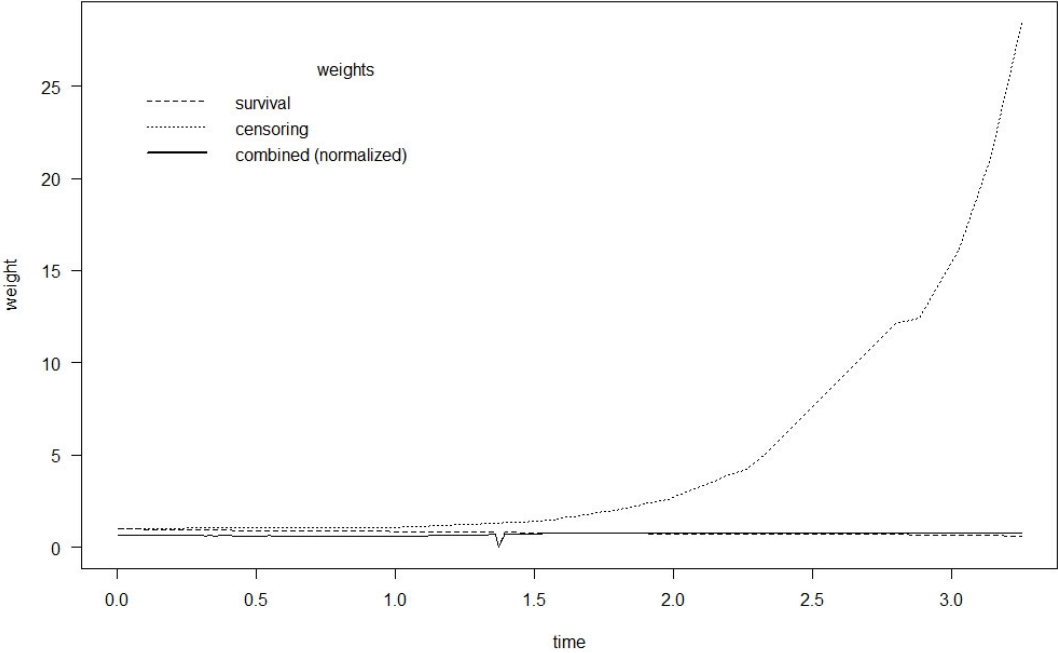

Supplemental figure 4. The distribution of weights used for all-cause mortality after truncation

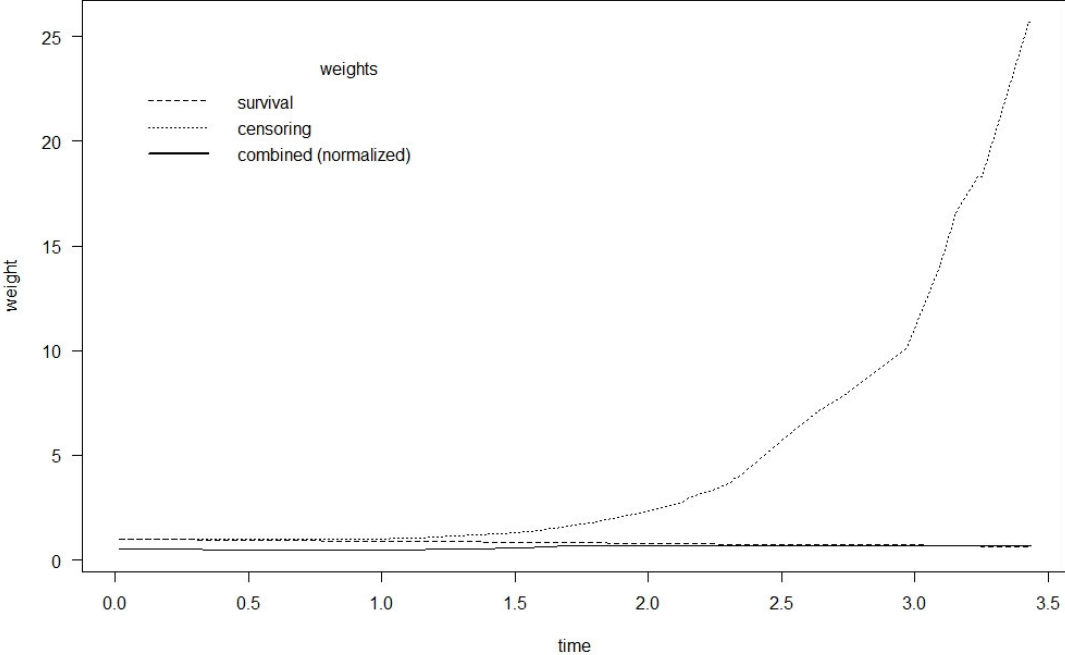

Supplement: NIHMS1732580-supplement-Supplement_2.pdf [file NIHMS1732580-supplement-Supplement_2.pdf]
